# Supplementary material for: Learning about urban climate solutions from case studies
Source: Springer Nature journal article supplement (doi:10.1038/s41558-019-0440-x), 2019-03-18
Supplement: 41558_2019_440_MOESM1_ESM.pdf [file 41558_2019_440_MOESM1_ESM.pdf]

In the format provided by the authors and unedited.

# Learning about urban climate solutions from case studies

William F. Lamb <sup>1,2\*</sup>, Felix Creutzig <sup>1,3</sup>, Max W. Callaghan <sup>1,2</sup> and Jan C. Minx <sup>1,2</sup>

---

<sup>1</sup>Mercator Research Institute on Global Commons and Climate Change, Berlin, Germany. <sup>2</sup>School of Earth and Environment, University of Leeds, Leeds, UK.

<sup>3</sup>Technische Universität Berlin, Berlin, Germany. \*e-mail: [lamb@mcc-berlin.net](mailto:lamb@mcc-berlin.net)

# Learning about urban climate solutions

William F. Lamb<sup>1,2\*</sup>, Felix Creutzig<sup>1,3</sup>, Max W. Callaghan<sup>1,2</sup>, Jan C. Minx<sup>1,2</sup>

<sup>1</sup> Mercator Research Institute on Global Commons and Climate Change, Torgauer Straße 12-15, EUREF Campus #19, 10829 Berlin, Germany

<sup>2</sup> School of Earth and Environment, University of Leeds, Leeds LS2 9JT, UK

<sup>3</sup> Technische Universität Berlin, Straße des 17. Juni 135, 10623 Berlin, Germany

\* [lamb@mcc-berlin.net](mailto:lamb@mcc-berlin.net)

## Supplementary Figures

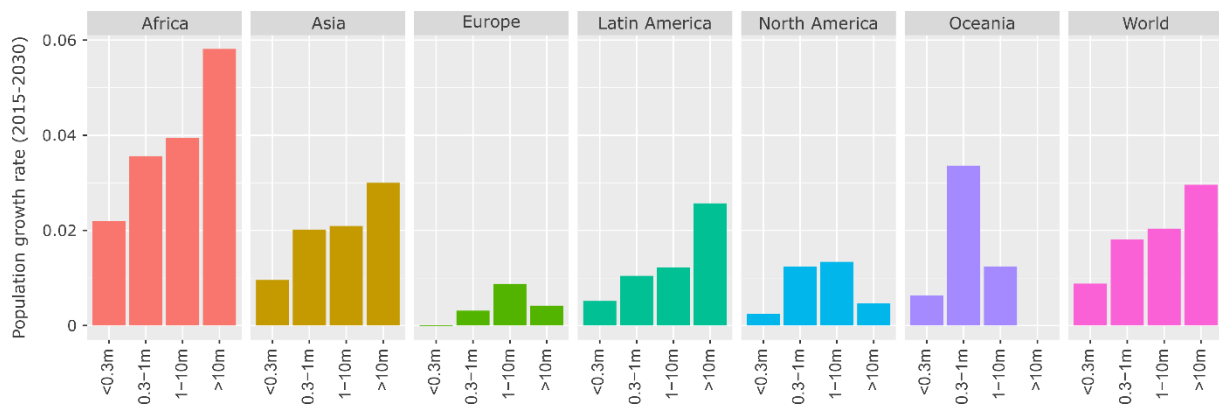

**Supplementary Figure 1: Projected population growth rate by region and city size, 2015-2030.** Population data from ref<sup>1</sup>, using agglomeration data where available.

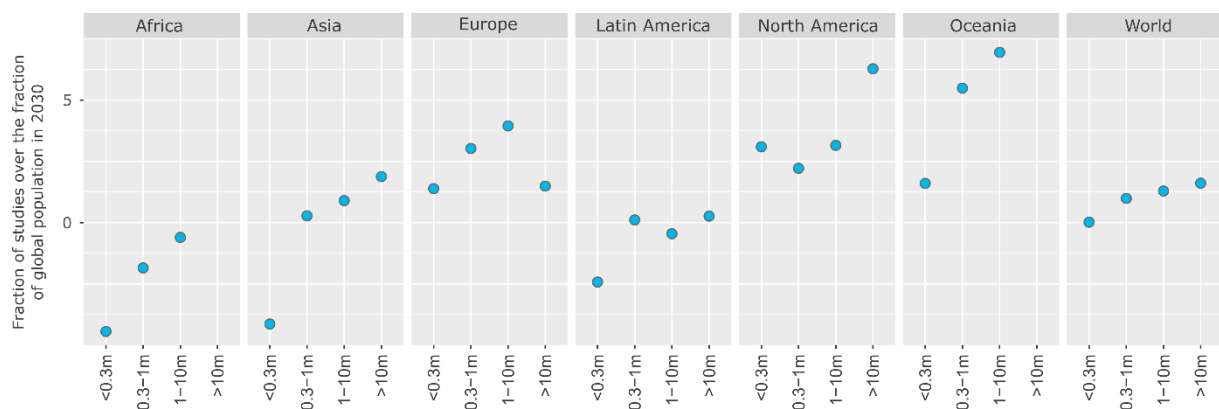

**Supplementary Figure 2: The global distribution of urban case studies versus population size.** To normalise, where the numerator (% of global population in a region & city size) exceeds the denominator (% of case studies in a region & city size), we subtract the fraction from 2. Population data from ref<sup>1</sup>, using agglomeration data where available.

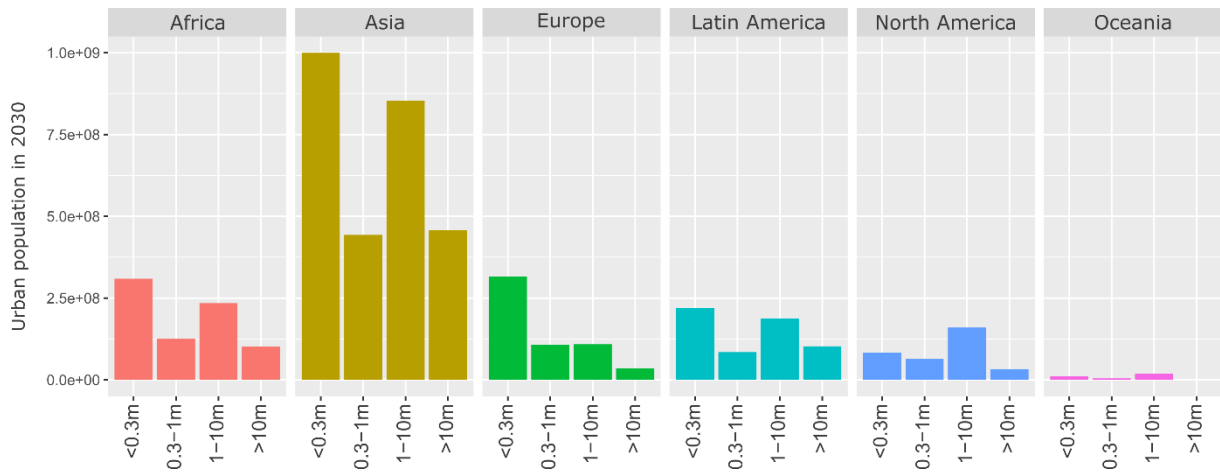

**Supplementary Figure 3: Total urban population in 2030 by region and city size.** Population data from ref<sup>1</sup>, using agglomeration data where available.

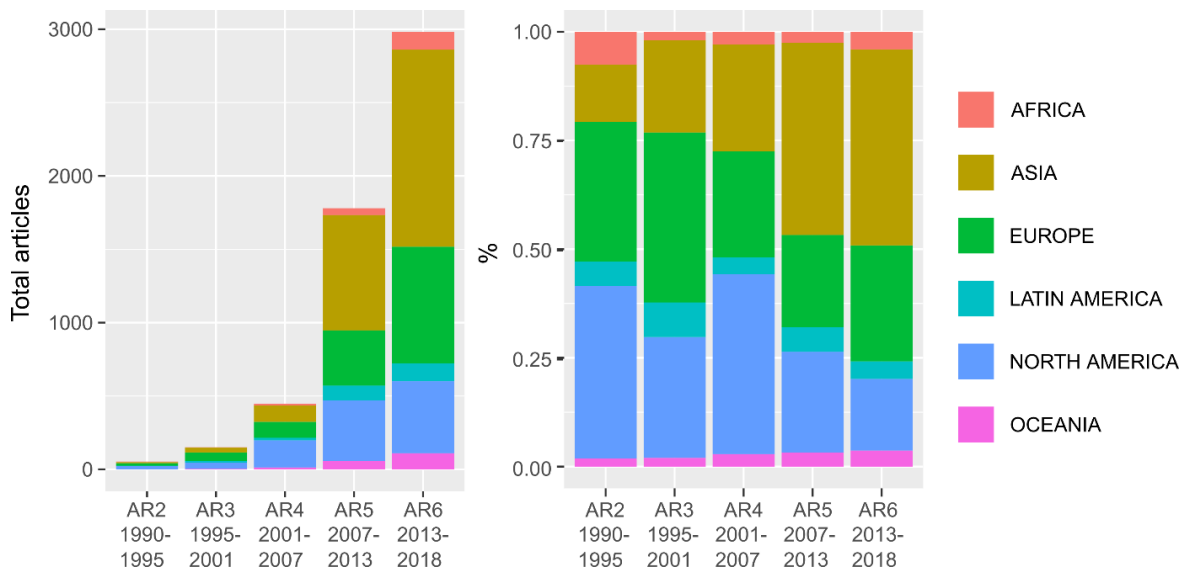

**Supplementary Figure 4: Total articles and regional proportions of case study literature by IPCC Assessment Period**

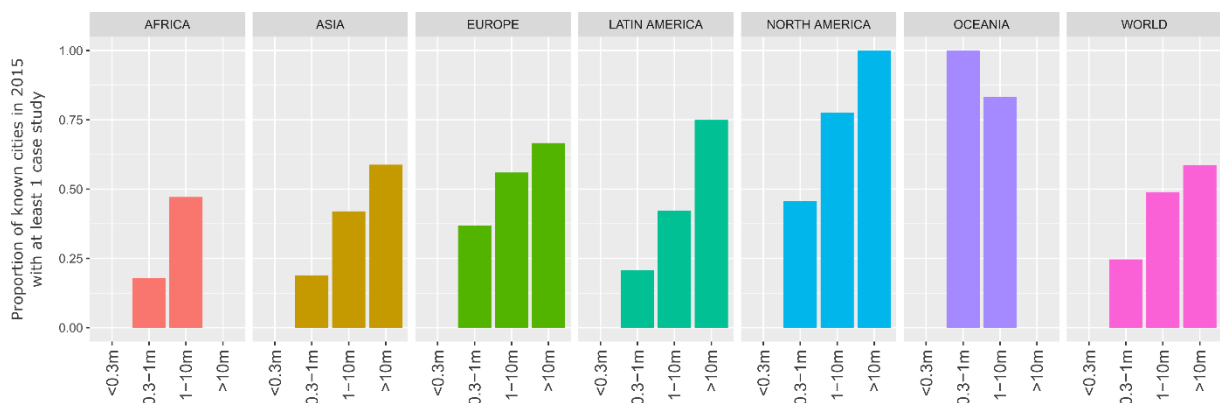

**Supplementary Figure 5: Direct coverage of case studies.** Missing values due to absent data (small cities) and because there are no mega-cities in Africa and Oceania as of 2015. Population data from ref<sup>1</sup>, using agglomeration data where available.

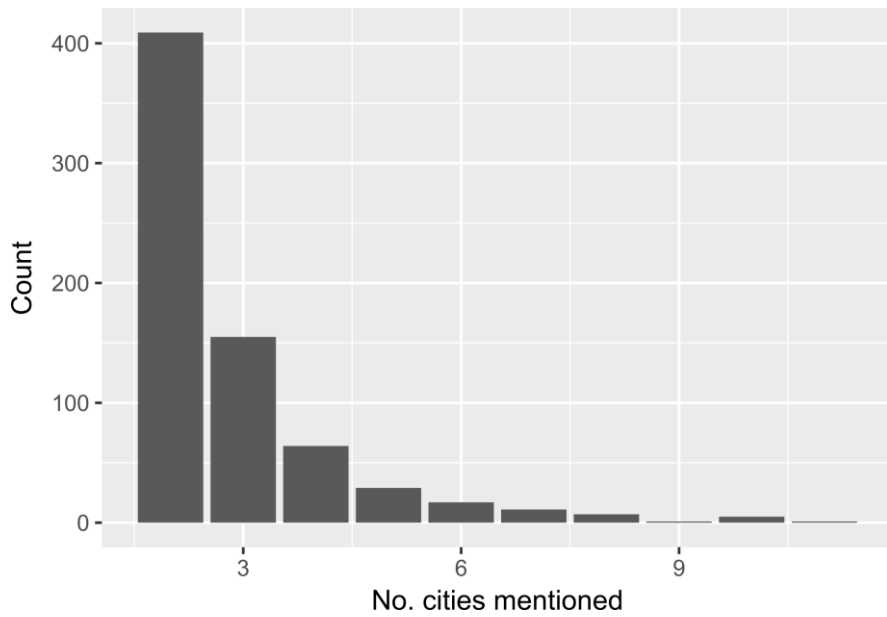

*Supplementary Figure 6: Number of cities mentioned in comparative studies*

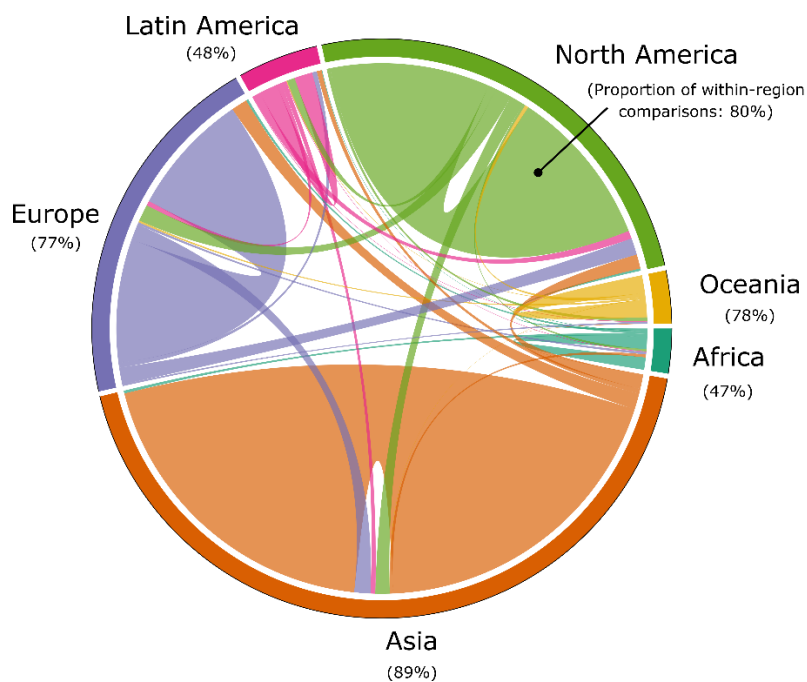

*Supplementary Figure 7: Inter and intra-regional comparative research on urban climate mitigation. Each link in the chord diagram is based on the pairwise coupling of two cities within a document. Documents where more than one city is mentioned in the abstract are used, totalling 699 studies. The proportion of regional couplings that pair with other regions (i.e. inter-regional urban comparisons) are indicated as percentages.*

## Supplementary Tables

| ID | Topic Name         | Stemmed Keywords                             | Marginal Topic Distribution (%) |
|----|--------------------|----------------------------------------------|---------------------------------|
| 1  | Climate governance | climat; chang; polici; local; govern         | 8.9                             |
| 2  | Energy use         | energi; consumpt; effici; sector; renew      | 8.0                             |
| 3  | Energy systems     | system; electr; power; cost; generat         | 7.4                             |
| 4  | Urban form         | urban; land; area; model; ecolog             | 7.3                             |
| 5  | Buildings          | build; energi; design; residenti; perform    | 6.8                             |
| 6  | CO2 emissions      | carbon; emiss; industri; low; intens         | 6.7                             |
| 7  | GHG emissions      | emiss; ghg; reduct; greenhous; gas           | 6.3                             |
| 8  | Cooling demand     | air; temperatur; cool; roof; climat          | 6.3                             |
| 9  | Transportation     | transport; traffic; travel; public; car      | 5.8                             |
| 10 | Vehicles           | vehicl; fuel; electr; charg; drive           | 5.0                             |
| 11 | Households         | household; incom; behavior; survey; resid    | 4.7                             |
| 12 | Waste management   | wast; landfil; solid; recycl; manag          | 4.7                             |
| 13 | Heat demand        | heat; district; thermal; pump; network       | 4.6                             |
| 14 | Water demand       | water; suppli; treatment; manag; wastewat    | 4.3                             |
| 15 | Renewable energy   | solar; radiat; energi; photovolta; collector | 3.8                             |
| 16 | Urban ecology      | tree; forest; benefit; speci; plant          | 3.4                             |

**Supplementary Table 1: List of topics and their keywords.** Topic names are manually coded by the authors based on a review of the stemmed keywords and associated documents. The marginal topic distribution denotes the percentage of the document set where this topic is found. One topic was manually removed (keywords: lowcarbon; develop; industri; economi; citi) as this is largely synonymous in content with ‘CO2 emissions’ and is only relevant for a specific (but large) subset of studies in China.

| Authors             | Year | Title                                                      | Topics                                                      |
|---------------------|------|------------------------------------------------------------|-------------------------------------------------------------|
| Khalil,<br>H.A.E.E. | 2009 | Energy efficiency strategies in urban<br>planning of cites | Buildings; Climate<br>governance; energy use;<br>urban form |

|                                                 |      |                                                                                                                                                                  |                                                                           |
|-------------------------------------------------|------|------------------------------------------------------------------------------------------------------------------------------------------------------------------|---------------------------------------------------------------------------|
| Attia, S & De Herde, A                          | 2010 | Active solar retrofit of a residential house, A case study in Egypt                                                                                              | Buildings; Heat demand; Cooling demand; Renewable energy                  |
| Fahmy, M & Sharples, S                          | 2011 | Urban form, thermal comfort and building CO2 emissions - a numerical analysis in Cairo                                                                           | Buildings; GHG emissions; Cooling demand; Urban form                      |
| El-Deeb, K, El-Zafarany, A & Sherif, A          | 2012 | Effect of building form and urban pattern : On energy consumption of residential buildings in different desert climates                                          | Buildings; Urban form                                                     |
| Verdeil, E, Arik, E, Bolzon, H & Markoum, J     | 2015 | Governing the transition to natural gas in Mediterranean Metropolis: The case of Cairo, Istanbul and Sfax (Tunisia)                                              | Climate governance; Energy use; Heat demand; Renewable energy; Urban form |
| Dabaieh, M, Wanas, O, Hegazy, MA & Johansson, E | 2015 | Reducing cooling demands in a hot dry climate: A simulation study for non-insulated passive cool roof thermal performance in residential buildings               | Buildings; Cooling demand                                                 |
| Kares, M & Singh, P                             | 2016 | Assessment of building integrated photovoltaics for the residential section in representative Urban areas in Egypt                                               | Buildings; Energy use; Households; Renewable energy; Urban form           |
| Aboulnaga, M.                                   | 2016 | High-rise buildings in context of sustainability; urban metaphors of greater Cairo, Egypt: A case study on sustainability and strategic environmental assessment | Buildings                                                                 |
| Chen, H & Dietrich, U                           | 2017 | Land-use planning for zero-energy-buildings: Comparison of four high-density cities                                                                              | Energy use; Urban form                                                    |

*Supplementary Table 2: Urban climate mitigation literature on Cairo*

| <b>Title</b>                                                                                                                          | <b>Method</b>                         | <b>Ref</b> |
|---------------------------------------------------------------------------------------------------------------------------------------|---------------------------------------|------------|
| The neglected social dimensions to a vehicle-to-grid (V2G) transition: a critical and systematic review                               | Systematic review                     | 2          |
| Interdependence between Urban Processes and Energy Transitions: The Urban Energy Transitions (DUET) Framework                         | Case meta-analysis                    | 3          |
| Decarbonising transport to achieve Paris Agreement targets                                                                            | Quantitative synthesis                | 4          |
| Green roofs against pollution and climate change. A review                                                                            | Narrative review                      | 5          |
| Urban and peri-urban agriculture and forestry: Transcending poverty alleviation to climate change mitigation and adaptation           | Narrative review                      | 6          |
| Prospects and challenges for sustainable sanitation in developed nations: a critical review                                           | Narrative review                      | 7          |
| A meta-analysis of urban and peri-urban agriculture and forestry in mediating climate change                                          | Narrative review                      | 8          |
| A review on co-benefits of mass public transportation in climate change mitigation                                                    | Narrative review                      | 9          |
| What do we know about the study of distributed generation policies and regulations in the Americas? A systematic review of literature | Bibliometric study                    | 10         |
| Co-benefits of greenhouse gas mitigation: a review and classification by type, mitigation sector, and geography                       | Bibliometric study & narrative review | 11         |
| Benefits of green roofs: A systematic review of the evidence for three ecosystem services                                             | Quantitative synthesis                | 12         |

|                                                                                           |                                                               |    |
|-------------------------------------------------------------------------------------------|---------------------------------------------------------------|----|
| Assessing the success of electricity demand response programs: A meta-analysis            | Meta-analysis                                                 | 13 |
| The economic benefits and costs of trees in urban forest stewardship: A systematic review | Bibliometric study, quantitative synthesis & narrative review | 14 |

**Supplementary Table 3: Systematic reviews of urban climate change mitigation.** The minimum criteria for a 'systematic review' here is the formal selection of literature via a database search query. Some reviews <sup>(10,11,13)</sup> focus on non-urban issues, but derive important conclusions for scientific learning at urban scale, and thus should be included in the relevant literature base on urban-scale climate change mitigation. See methods for our identification procedure.

| Topic              | Proportion (%) | Topic            | Proportion |
|--------------------|----------------|------------------|------------|
| GHG emissions      | 9.6            | Waste management | 5.5        |
| Climate governance | 8.9            | Vehicles         | 4.3        |
| Energy consumption | 8.3            | Heat demand      | 3.9        |
| Transportation     | 7.5            | Renewable energy | 3.8        |
| Air pollution      | 7.5            | Water demand     | 3.5        |
| CO2 emissions      | 6.9            | Urban ecology    | 2.9        |
| Buildings          | 5.8            | Cooling demand   | 2.7        |
| Urban form         | 5.7            | Households       | 2.6        |

**Supplementary Table 4: Topic proportions of 'forward-looking' case studies**

| Region        | No. case studies | No. 'forward-looking' studies | Proportion (%) |
|---------------|------------------|-------------------------------|----------------|
| Africa        | 158              | 12                            | 8              |
| Asia          | 1934             | 335                           | 17             |
| Europe        | 1145             | 227                           | 19             |
| Latin America | 206              | 37                            | 18             |
| North America | 1054             | 131                           | 12             |
| Oceania       | 151              | 23                            | 15             |

**Supplementary Table 5: Regional coverage of 'forward-looking' case studies**



## Supplementary references

1. UN DESA. *World Urbanization Prospects: The 2018 Revision*. (United Nations, Department of Economic and Social Affairs, Population Division, 2018).
2. Sovacool, B. K., Noel, L., Axsen, J. & Kempton, W. The neglected social dimensions to a vehicle-to-grid (V2G) transition: A critical and systematic review. *Environ. Res. Lett.* **13**, (2018).
3. Huang, P. & Castán Broto, V. Interdependence between Urban Processes and Energy Transitions: The Urban Energy Transitions (DUET) Framework. *Environ. Innov. Soc. Transitions* **28**, 35–45 (2018).
4. Gota, S., Huizenga, C., Peet, K., Medimorec, N. & Bakker, S. Decarbonising transport to achieve Paris Agreement targets. *Energy Effic.* 1–24 (2018). doi:10.1007/s12053-018-9671-3
5. Li, Y. & Babcock, R. W. Green roofs against pollution and climate change. A review. *Agron. Sustain. Dev.* **34**, 695–705 (2014).
6. Lwasa, S. *et al.* Urban and peri-urban agriculture and forestry: Transcending poverty alleviation to climate change mitigation and adaptation. *Urban Clim.* **7**, 92–106 (2014).
7. Brands, E. Prospects and challenges for sustainable sanitation in developed nations: a critical review. *Environ. Rev.* **22**, 346–363 (2014).
8. Lwasa, S. *et al.* A meta-analysis of urban and peri-urban agriculture and forestry in mediating climate change. *Curr. Opin. Environ. Sustain.* **13**, 68–73 (2015).
9. Kwan, S. C. & Hashim, J. H. A review on co-benefits of mass public transportation in climate change mitigation. *Sustain. Cities Soc.* **22**, 11–18 (2016).
10. Garcez, C. A. G. What do we know about the study of distributed generation policies and regulations in the Americas? A systematic review of literature. *Renew. Sustain. Energy Rev.* **75**, 1404–1416 (2017).
11. Deng, H.-M., Liang, Q.-M., Liu, L.-J. & Anadon, L. D. Co-benefits of greenhouse gas mitigation: a review and classification by type, mitigation sector, and geography. *Environ. Res. Lett.* **12**, (2018).
12. Francis, L. F. M. & Jensen, M. B. Benefits of green roofs: A systematic review of the evidence for three ecosystem services. *Urban For. Urban Green.* **28**, 167–176 (2017).
13. Srivastava, A., Van Passel, S. & Laes, E. Assessing the success of electricity demand response programs: A meta-analysis. *Energy Res. Soc. Sci.* **40**, 110–117 (2018).
14. Song, X. P., Tan, P. Y., Edwards, P. & Richards, D. The economic benefits and costs of trees in urban forest stewardship: A systematic review. *Urban For. Urban Green.* **29**, 162–170 (2018).
